# Supplementary material for: On the Role of PDZ Domain-Encoding Genes in Drosophila Border Cell Migration
Source: PubMed Central journal article supplement (PMC3484668; doi:10.1534/g3.112.004093), 2012-11-01
Supplement: supp_2.11.1379_004093SI.pdf [file supp_2.11.1379_004093SI.pdf]

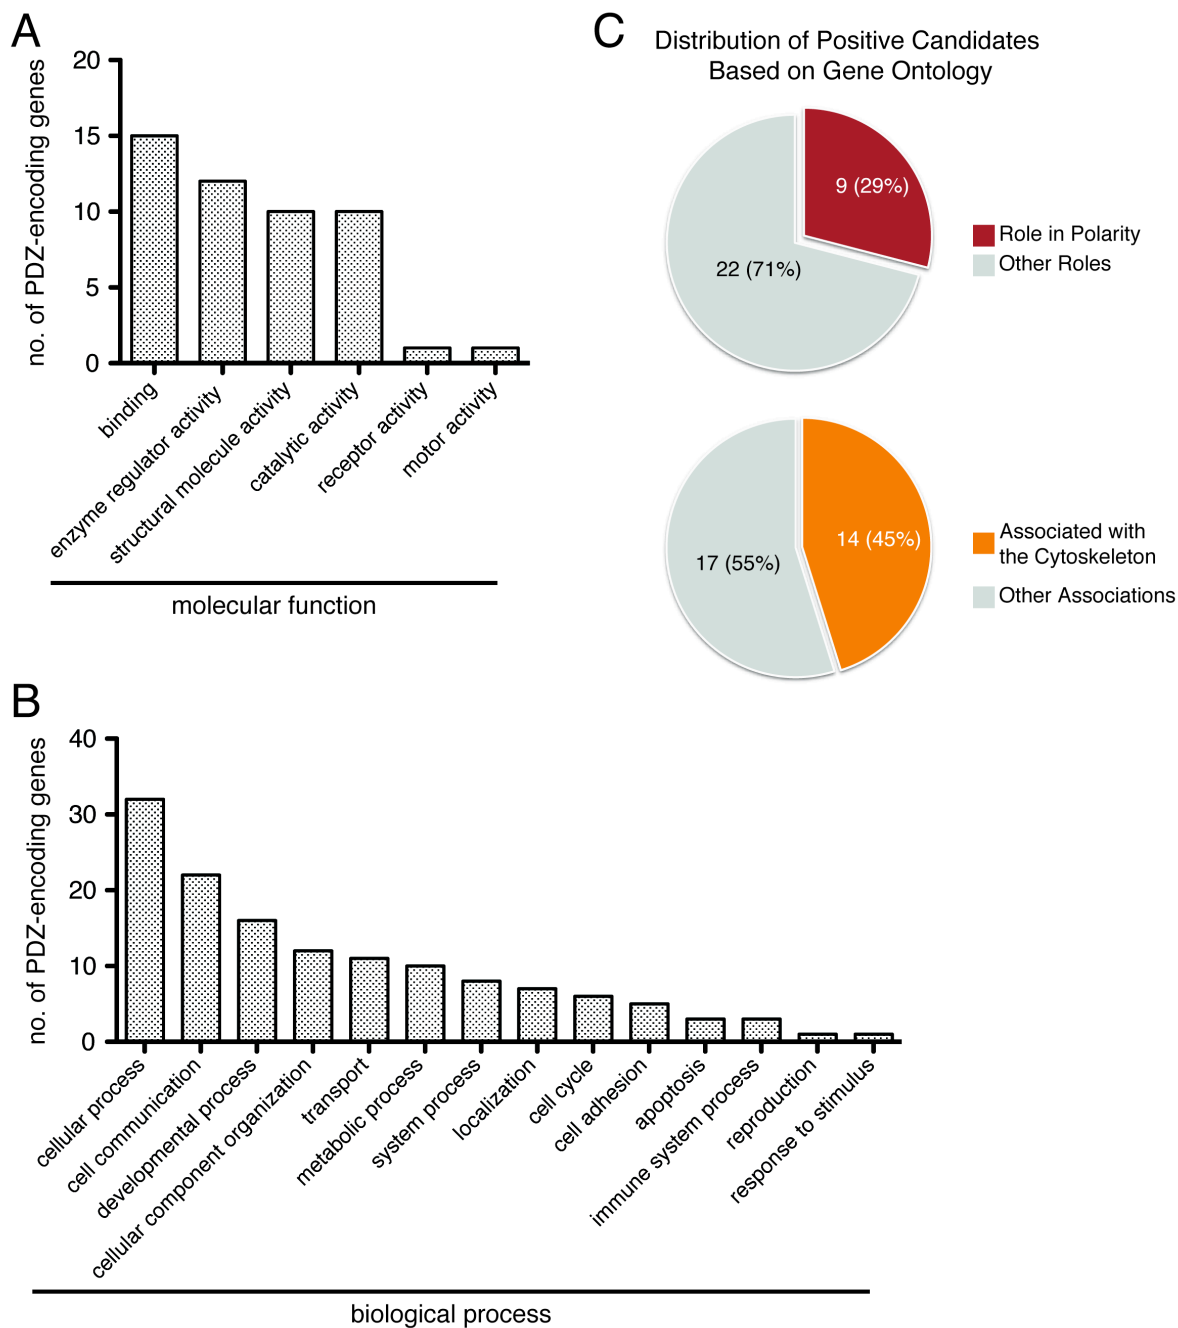

**Figure S1** Drosophila PDZ-domain-containing proteins are functionally diverse and involved in numerous processes. (A-B) Of the 66 genes annotated to contain a PDZ domain, 51 were analyzed by PANTHER (<http://www.pantherdb.org>). (A) PDZ proteins are found in almost half (6/14) of the classifications for molecular function and predominantly annotated as having binding, enzyme regulator, structural, or catalytic activity. Molecular function is defined as the action that a protein performs on its direct target. A protein is assigned only one molecular function. (B) PDZ proteins contribute to 14 out of 19 annotated biological processes. A protein can contribute to multiple processes. (C) Positive hit genes were surveyed for roles in polarity or association with the cytoskeleton using AmiGO (<http://amigo.geneontology.org>). Genes can fall into both categories. The polarity genes include: *baz*, *CASK*, *dsh*, *Lap1*, *par-6*, *Patj*, *pyd*, *sdt* and *veli*. The following genes are associated with the cytoskeleton: *CG14168*, *CG42319*, *CG42788*, *CG5921*, *CG6498*, *dsh*, *Lap1*, *LIMK1*, *Patj*, *Ptpmeg*, *RhoGAP19D*, *Syn2*, *veli*, and *Zasp52*.

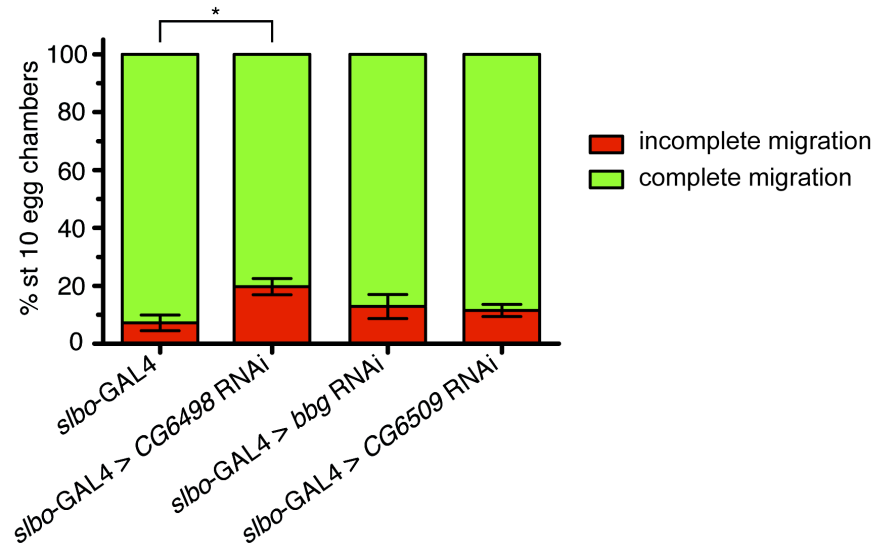

**Figure S2** *slbo-GAL4*-driven RNAi expression targeting three positive candidates. Quantification of border cell migration at stage 10, shown as the percentage of border cells with complete (green) or incomplete (red) migration in egg chambers expressing *CG6498* RNAi v35100, *bbg* RNAi v15975, and *CG6509* RNAi v22496 in border cells using *slbo-GAL4*. Two-tailed unpaired t-test was used to determine statistical significance (\*,  $p < 0.05$ ). At least 50 egg chambers were scored in at least three trials.

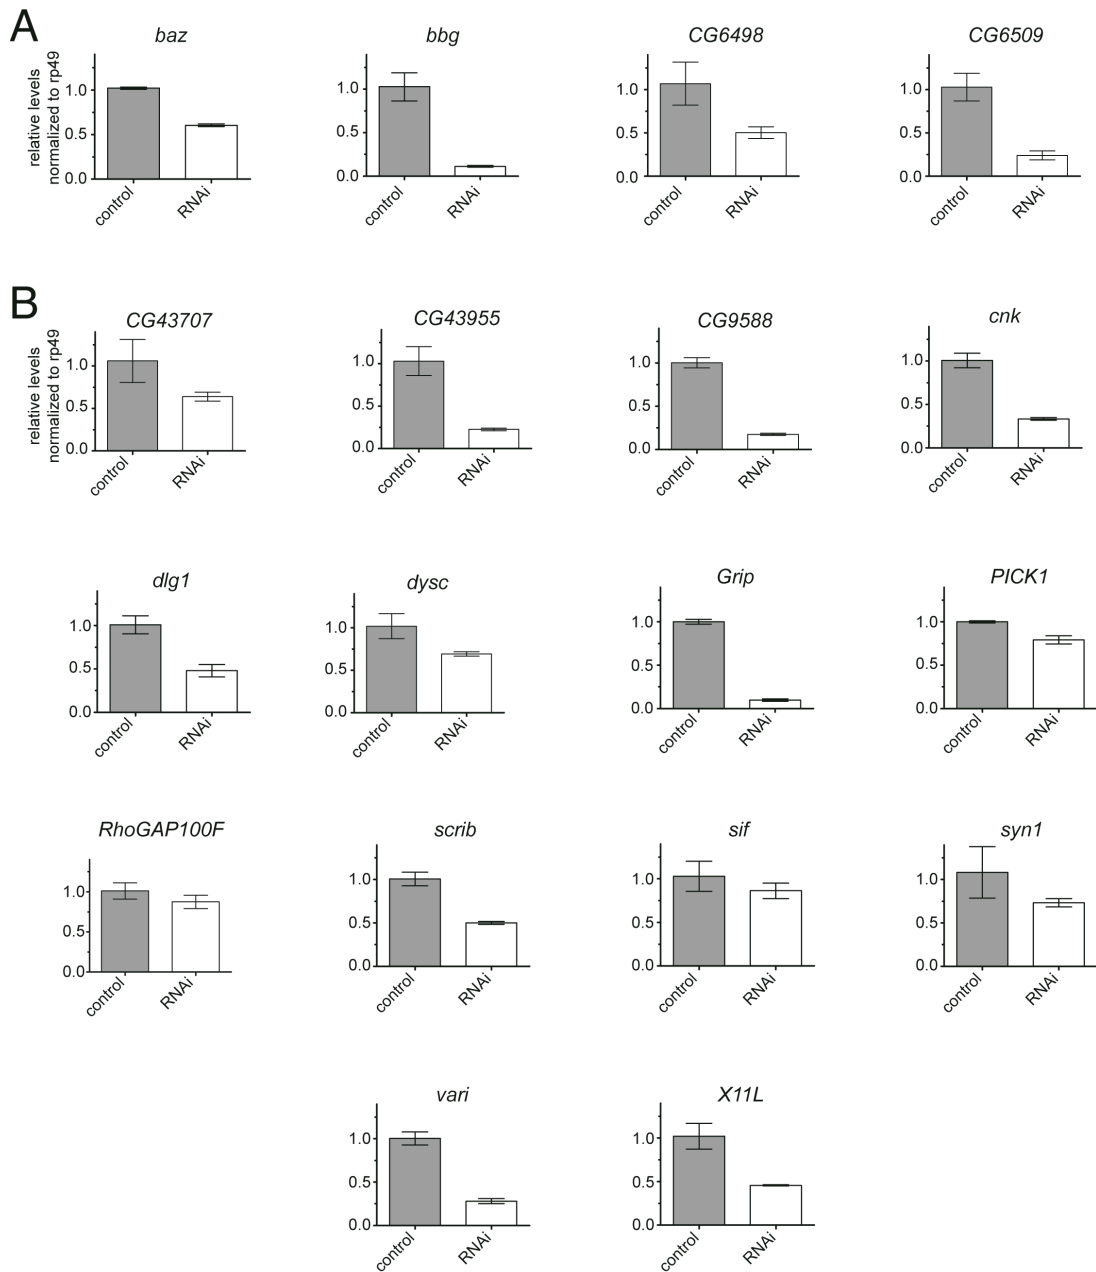

**Figure S3** Gene expression levels in control and RNAi knockdown measured by quantitative RT-PCR. Ubiquitous expression of RNAi against a subset of (A) positive candidates and (B) negative candidates result in varying degrees of knockdown. The mean transcript levels were calculated from three biological replicates using  $\Delta\Delta C_T$  method and normalized to *rp49* mRNA levels. Controls are RNAi to GFP. Error bars represent standard deviation.

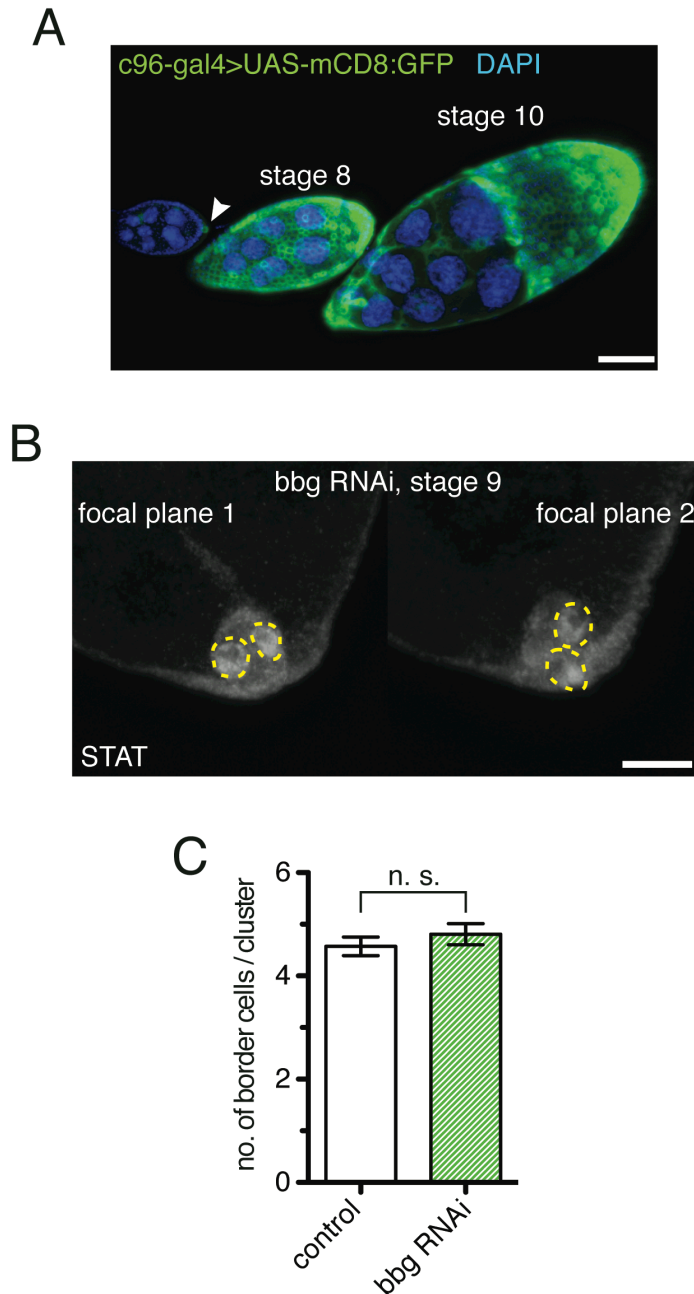

**Figure S4** Bbg function in early development of border cells. (A) *c96*-GAL4 expression (green) in egg chambers is limited to the polar cells (arrowhead) in the early stages but expands to most of the follicle cell epithelium starting at stage 8 of *Drosophila* oogenesis. The image was acquired to show the follicle cell epithelium. The nuclei are visualized with DAPI (blue). Scale bar is 50  $\mu$ m. (B) STAT nuclear enrichment (yellow dashed circles) is observed in border cells expressing *bbg* RNAi line v15975 driven by *c306*-GAL4 before detachment (stage 9). Upon *bbg* knockdown, 72% (N=21) of detaching clusters still retain nuclear STAT enrichment in all or some border cells in the cluster. The images are of the same border cell cluster taken at different focal planes. Scale bar is 10  $\mu$ m. (C) Border cell recruitment is unaffected by *bbg* RNAi. On average, both control (N=35) and *bbg* RNAi (N=31) clusters have ~5 border cells. Error bars represent SEM. N.S., not statistically significant (two-tailed unpaired t-test).

**Table S1 Complete results of the PDZ RNAi survey of border cell migration**

| Group <sup>a</sup> | Gene Name     | Gene Symbol | Annotation Symbol | RNAi line                 | trial 1               |                | trial 2  |     | trial 3  |     |
|--------------------|---------------|-------------|-------------------|---------------------------|-----------------------|----------------|----------|-----|----------|-----|
|                    |               |             |                   |                           | % defect <sup>b</sup> | n <sup>c</sup> | % defect | n   | % defect | n   |
| Pos. Mult.         | bazooka       | baz         | CG5055            | 2914 (M) <sup>d</sup>     | 43% <sup>e</sup>      | 116            |          |     |          |     |
|                    |               |             |                   | 2915 (M)                  | 23%                   | 137            |          |     |          |     |
| Pos. Mult.         | big bang      | bbg         | CG42230           | 15975                     | 19%                   | 58             | 15%      | 112 |          |     |
|                    |               |             |                   | 101691                    | 10%                   | 132            |          |     |          |     |
|                    |               |             |                   | 36111                     | 6%                    | 78             |          |     |          |     |
| Pos. Mult.         | CASK ortholog | CASK        | CG6703            | 34185 (S†,M) <sup>f</sup> | 23%                   | 79             | 15%      | 80  |          |     |
|                    |               |             |                   | 34184                     | 22%                   | 122            | 10%      | 251 |          |     |
|                    |               |             |                   | 104793                    | 2%                    | 139            |          |     |          |     |
| Pos. Mult.         | CG5921        | CG5921      | CG5921            | 37875                     | 33%                   | 94             | 23%      | 106 |          |     |
|                    |               |             |                   | 37874                     | 18%                   | 91             |          |     |          |     |
| Pos. Mult.         | CG6498        | CG6498      | CG6498            | 35101                     | 20%                   | 97             | 11%      | 125 |          |     |
|                    |               |             |                   | 35100                     | 17%                   | 116            | 12%      | 164 |          |     |
|                    |               |             |                   | 109282                    | 13%                   | 176            |          |     |          |     |
| Pos. Mult.         | CG6509        | CG6509      | CG6509            | 46234 (S†,M)              | 11%                   | 54             | 12%      | 139 |          |     |
|                    |               |             |                   | 101596                    | 11%                   | 74             |          |     |          |     |
|                    |               |             |                   | 22496 (S†,M)              | 9%                    | 87             |          |     |          |     |
| Pos. Mult.         | Gef26         | Gef26       | CG9491            | 27017 (M)                 | 19%                   | 86             | 28%      | 197 |          |     |
|                    |               |             |                   | 27015 (M)                 | 10%                   | 98             | 20%      | 98  |          |     |
|                    |               |             |                   | 105159                    | 15%                   | 59             |          |     |          |     |
| Pos. Mult.         | Lap1          | Lap1        | CG10255           | 18600 (M)                 | 15%                   | 112            | 13%      | 119 |          |     |
|                    |               |             |                   | JF02362 <sup>g</sup>      | 10%                   | 134            |          |     |          |     |
| Pos. Mult.         | LIM-kinase1   | LIMK1       | CG1848            | 25344                     | 10%                   | 125            | 8%       | 194 | 12%      | 220 |
|                    |               |             |                   | 25343                     | 6%                    | 128            |          |     |          |     |
|                    |               |             |                   | 2x RNAi <sup>h</sup>      | 18%                   | 50             |          |     |          |     |
| Pos. Mult.         | par-6         | par-6       | CG5884            | 19732 (M†)                | 38%                   | 58             | 26%      | 114 |          |     |
|                    |               |             |                   | 108560                    | 44%                   | 59             |          |     |          |     |
|                    |               |             |                   | 2x RNAi <sup>i</sup>      | 14%                   | 132            |          |     |          |     |
| Pos. Mult.         | PatJ          | Patj        | CG12021           | 31620                     | 13%                   | 168            | 20%      | 128 |          |     |
|                    |               |             |                   | 12021R-3 <sup>j</sup>     | 26%                   | 184            |          |     |          |     |
|                    |               |             |                   | 101877                    | 3%                    | 63             |          |     |          |     |
|                    |               |             |                   | 12021R-4 <sup>j</sup>     | lethal                |                | lethal   |     |          |     |
| Pos. Mult.         | Rim           | Rim         | CG33547           | 39384                     | 26%                   | 92             | 12%      | 50  |          |     |
|                    |               |             |                   | 39385                     | 24%                   | 94             | 1%       | 78  | 12%      | 113 |
|                    |               |             |                   | JF02610 <sup>g</sup>      | 7%                    | 254            |          |     |          |     |
| Pos. Mult.         | stardust      | sdt         | CG32717           | 100685                    | 39%                   | 62             | 11%      | 57  |          |     |
|                    |               |             |                   | 29844                     | 13%                   | 182            |          |     |          |     |
|                    |               |             |                   | 29843                     | 6%                    | 197            |          |     |          |     |
| Pos. Mult.         | veli          | veli        | CG7662            | 43094 (M†)                | 50%                   | 88             | 27%      | 101 |          |     |

|             |                     |           |         |                                         |        |     |     |     |     |
|-------------|---------------------|-----------|---------|-----------------------------------------|--------|-----|-----|-----|-----|
|             |                     |           |         | 46963 (M)                               | 31%    | 61  |     |     |     |
| Pos. Single | CG14168             | CG14168   | CG14168 | 17414                                   | 13%    | 55  | 21% | 226 |     |
|             |                     |           |         | 103225                                  | 2%     | 56  |     |     |     |
| Pos. Single | CG34375             | CG34375   | CG34375 | 23904                                   | 29%    | 63  | 5%  | 166 | 13% |
|             |                     |           |         | 102586                                  | 4%     | 56  |     |     |     |
| Pos. Single | CG42319             | CG42319   | CG42319 | 23928                                   | 41%    | 152 |     |     |     |
|             |                     |           |         | 32835 (M)                               | 8%     | 197 |     |     |     |
| Pos. Single | CG42788             | CG42788   | CG42788 | 22311                                   | 40%    | 72  | 5%  | 134 | 11% |
|             |                     |           |         | 108180                                  | 1%     | 123 |     |     |     |
|             |                     |           |         | 45034                                   | 4%     | 72  |     |     |     |
| Pos. Single | CG6688              | CG6688    | CG6688  | 48260                                   | 15%    | 86  | 19% | 214 |     |
|             |                     |           |         | 106732                                  | 1%     | 139 |     |     |     |
| Pos. Single | Dishevelled         | dsh       | CG18361 | 101525                                  | 12%    | 93  |     |     |     |
|             |                     |           |         | JF01254 <sup>B</sup>                    | 6%     | 188 |     |     |     |
|             |                     |           |         | 18361R-2 <sup>j</sup>                   | lethal |     |     |     |     |
|             |                     |           |         | 18361R-3 <sup>j</sup>                   | lethal |     |     |     |     |
|             |                     |           |         | JF01253 <sup>B</sup>                    | 8%     | 89  |     |     |     |
|             | Efa6 pleckstrin and |           |         |                                         |        |     |     |     |     |
| Pos. Single | Sec7 domain         | Efa6      | CG31158 | 42321                                   | 14%    | 128 | 12% | 109 |     |
|             | containing          |           |         |                                         |        |     |     |     |     |
| Pos. Single | HtrA2               | HtrA2     | CG8464  | 24104                                   | 16%    | 75  | 9%  | 153 | 19% |
|             |                     |           |         | 24106                                   | 9%     | 132 |     |     |     |
|             | Magi                | Magi      | CG30388 | 41735                                   | 13%    | 128 | 4%  | 167 |     |
|             |                     |           |         | 41736                                   | 10%    | 62  |     |     |     |
| Pos. Single | menage a trois      | metro     | CG30021 | 29967                                   | 10%    | 73  |     |     |     |
|             |                     |           |         | 29965                                   | 1%     | 128 |     |     |     |
|             |                     |           |         | 110814                                  | 1%     | 129 |     |     |     |
| Pos. Single | polychaetoid        | pyd       | CG43140 | 38863                                   | 15%    | 111 | 23% | 188 |     |
|             |                     |           |         | 104159                                  | 6%     | 142 |     |     |     |
| Pos. Single | Ptpmeg              | Ptpmeg    | CG1228  | 38651                                   | 12%    | 165 | 22% | 78  |     |
|             |                     |           |         | 103740                                  | 3%     | 130 |     |     |     |
| Pos. Single | RhoGAP19D           | RhoGAP19D | CG1412  | 43955 (M <sup>+</sup> )                 | 42%    | 57  | 59% | 165 |     |
|             |                     |           |         | HMS00352 <sup>B</sup>                   | 9%     | 161 |     |     |     |
|             |                     |           |         | dsRNA 2.1 <sup>k</sup>                  | 8%     | 217 |     |     |     |
|             |                     |           |         | dsRNA 3.1 <sup>k</sup>                  | 3%     | 62  |     |     |     |
| Pos. Single | Rhophilin           | Rhp       | CG8497  | 24111                                   | 13%    | 102 | 11% | 204 |     |
|             |                     |           |         | 110377                                  | 3%     | 152 |     |     |     |
| Pos. Single | Slip1               | Slip1     | CG1783  | 33006 (S)                               | 22%    | 124 | 10% | 168 |     |
|             |                     |           |         | 101106                                  | 6%     | 71  |     |     |     |
| Pos. Single | Syntrophin-like 2   | Syn2      | CG4905  | JF02999 <sup>B</sup>                    | 11%    | 157 | 6%  | 84  |     |
|             |                     |           |         | 110602                                  | 10%    | 67  |     |     |     |
| Pos. Single | Z band              | Zasp52    | CG30084 | 36563 (S <sup>+</sup> ,M <sup>+</sup> ) | 37%    | 97  | 19% | 124 |     |

|          |                                     |         |         | alternatively<br>spliced PDZ-motif<br>protein 52 |        |     |    |     |
|----------|-------------------------------------|---------|---------|--------------------------------------------------|--------|-----|----|-----|
|          |                                     |         |         | 106177                                           | 3%     | 65  |    |     |
|          |                                     |         |         | JF01133 <sup>B</sup>                             | 4%     | 227 |    |     |
| Negative | canoe                               | cno     | CG42312 | 102686                                           | 3%     | 92  |    |     |
| Negative | CG10362                             | CG10362 | CG10362 | 8317                                             | 4%     | 52  |    |     |
| Negative | CG15617                             | CG15617 | CG15617 | 19148                                            | 37%    | 65  | 7% | 162 |
|          |                                     |         |         | 19149                                            | 7%     | 94  | 6% | 167 |
|          |                                     |         |         | 103267                                           | 2%     | 50  |    |     |
| Negative | CG15803                             | CG15803 | CG15803 | 43635                                            | 3%     | 59  |    |     |
|          |                                     |         |         | 43636                                            | 1%     | 135 |    |     |
| Negative | CG32758                             | CG32758 | CG32758 | 28457                                            | 4%     | 99  |    |     |
|          |                                     |         |         | 108542                                           | 4%     | 130 |    |     |
| Negative | CG3402                              | CG3402  | CG3402  | 21485 (M <sup>+</sup> )                          | 7%     | 58  |    |     |
|          |                                     |         |         | 110191                                           | 6%     | 125 |    |     |
| Negative | CG43707                             | CG43707 | CG43707 | 25846S                                           | 8%     | 130 |    |     |
|          |                                     |         |         | 25847 (S <sup>+</sup> )                          | 6%     | 89  |    |     |
| Negative | CG43955                             | CG43955 | CG43955 | 103267                                           | 2%     | 50  |    |     |
| Negative | CG6619                              | CG6619  | CG6619  | 15622                                            | 4%     | 67  |    |     |
| Negative | CG9588                              | CG9588  | CG9588  | 47763                                            | 2%     | 95  |    |     |
|          |                                     |         |         | 100126                                           | 4%     | 167 |    |     |
|          |                                     |         |         | HM05013 <sup>B</sup>                             | 0%     | 93  |    |     |
| Negative | connector<br>enhancer of kar        | cnk     | CG6556  | 107746                                           | 3%     | 135 |    |     |
|          |                                     |         |         | HMS00238 <sup>B</sup>                            | 3%     | 152 |    |     |
| Negative | discs large 1                       | dlg1    | CG1725  | 41134 (S <sup>+</sup> ,M <sup>+</sup> )          | 4%     | 85  |    |     |
|          |                                     |         |         | 109274                                           | 2%     | 132 |    |     |
|          |                                     |         |         | 41136                                            | lethal |     |    |     |
|          |                                     |         |         | HMS01521 <sup>B</sup>                            | lethal |     |    |     |
| Negative | dyschronic                          | dysc    | CG43749 | 23278                                            | 9%     | 92  |    |     |
|          |                                     |         |         | 14082                                            | 5%     | 59  |    |     |
|          |                                     |         |         | 110019                                           | 3%     | 135 |    |     |
|          | Glutamate                           |         |         |                                                  |        |     |    |     |
| Negative | receptor binding<br>protein         | Grip    | CG14447 | 21003 (S <sup>+</sup> )                          | 5%     | 57  |    |     |
|          |                                     |         |         | 103551                                           | 6%     | 71  |    |     |
| Negative | Grasp65                             | Grasp65 | CG7809  | 22564                                            | 1%     | 125 |    |     |
| Negative | inactivation no<br>afterpotential D | inaD    | CG3504  | 26211                                            | 6%     | 64  |    |     |
| Negative | kermit                              | kermit  | CG11546 | 109297                                           | 2%     | 131 |    |     |
| Negative | locomotion defects                  | loco    | CG5248  | 9248 (M)                                         | 10%    | 67  | 6% | 237 |

|            |                                            |            |         |                          |        |     |    |     |
|------------|--------------------------------------------|------------|---------|--------------------------|--------|-----|----|-----|
|            |                                            |            |         | 110275                   | 7%     | 149 |    |     |
|            |                                            |            |         | HMS00455 <sup>B</sup>    | 3%     | 189 |    |     |
| Negative   | PICK1                                      | PICK1      | CG6167  | 22268                    | 4%     | 74  |    |     |
|            |                                            |            |         | 104486                   | 1%     | 163 |    |     |
|            |                                            |            |         | JF01199 <sup>B</sup>     | 3%     | 222 |    |     |
| Negative   | Prosap                                     | Prosap     | CG30483 | 21216 (M <sup>+</sup> )  | 5%     | 59  |    |     |
|            |                                            |            |         | 103592                   | 4%     | 98  |    |     |
| Negative   | Protostome-specific GEF                    | PsGEF      | CG43947 | 32088                    | 8%     | 122 |    |     |
|            |                                            |            |         | 109769                   | 1%     | 154 |    |     |
| Negative   | RhoGAP100F                                 | RhoGAP100F | CG1976  | 106241                   | 0%     | 62  |    |     |
|            |                                            |            |         | HMS00740 <sup>B</sup>    | 1%     | 161 |    |     |
| Negative   | RhoGEF2                                    | RhoGEF2    | CG9635  | JF01747 <sup>B</sup>     | 13%    | 145 | 6% | 135 |
|            |                                            |            |         | HMS01118 <sup>B</sup>    | 7%     | 180 |    |     |
|            |                                            |            |         | 110577                   | 3%     | 90  |    |     |
| Negative   | scribbled                                  | scrib      | CG43398 | 105412                   | 5%     | 172 |    |     |
|            |                                            |            |         | HMS01490 <sup>B</sup>    | lethal |     |    |     |
| Negative   | Spinophilin                                | Spn        | CG16757 | 19658 (S)                | 4%     | 56  |    |     |
|            |                                            |            |         | 105888                   | 1%     | 106 |    |     |
| Negative   | sprite                                     | sprt       | CG30023 | 107873                   | 2%     | 122 |    |     |
| Negative   | SRY interacting protein 1                  | Sip1       | CG10939 | 16958                    | 15%    | 65  | 9% | 170 |
| Negative   | still life                                 | sif        | CG34418 | 26132 (M)                | 7%     | 89  |    |     |
|            |                                            |            |         | 106832                   | 1%     | 106 |    |     |
| Negative   | Syntrophin-like 1                          | Syn1       | CG7152  | 27893                    | 4%     | 73  |    |     |
|            |                                            |            |         | 104992                   | 3%     | 111 |    |     |
|            |                                            |            |         | JF02654 <sup>B</sup>     | 3%     | 138 |    |     |
| Negative   | varicose                                   | vari       | CG9326  | 24156 (M <sup>+</sup> )  | 4%     | 70  |    |     |
|            |                                            |            |         | 104548                   | 6%     | 87  |    |     |
|            |                                            |            |         | HM05087 <sup>B</sup>     | 2%     | 124 |    |     |
| Negative   | X11L                                       | X11L       | CG5675  | 28652                    | 9%     | 110 |    |     |
|            |                                            |            |         | 27479                    | 9%     | 114 |    |     |
| Negative   | X11Lbeta                                   | X11Lbeta   | CG32677 | 8309 (S,M <sup>+</sup> ) | 2%     | 51  |    |     |
|            | Z band                                     |            |         |                          |        |     |    |     |
| Negative   | alternatively spliced PDZ-motif protein 66 | Zasp66     | CG6416  | 102980                   | 5%     | 131 |    |     |
| Not tested | arc                                        | a          | CG6741  |                          |        |     |    |     |
| Not tested | Myosin heavy chain-like                    | Mhcl       | CG31045 |                          |        |     |    |     |

<sup>a</sup> Group designation are as follows: Pos. Mult. = Positive, Multiple Hits; Pos. Single = Positive, Single Hit; Negative = No Hit.

<sup>b</sup> Percentage of stage 10 egg chambers in which border cell migration defects were observed upon RNAi expression.

<sup>c</sup> Number of stage 10 egg chambers scored per trial. N ≥ 50 in every trial.



<sup>d</sup> Lines that produced a phenotype (M) or were lethal (M<sup>†</sup>) in a genome-wide RNAi screen to study Notch signaling in *Drosophila* (Mummary-Widmer et al., 2009).

<sup>e</sup> Values highlighted in orange represent a migration defect ( $\geq 10\%$ ).

<sup>f</sup> Lines that produced a phenotype (S) or were lethal (S<sup>†</sup>) in a genome-wide RNAi screen to study *Drosophila* muscle morphogenesis and function (Schnorrer et al., 2010).

<sup>g</sup> RNAi lines from the Transgenic RNAi Project (TRiP), Harvard Medical School.

<sup>h</sup> LIMK1 double RNAi transgenic line (Ng insertions. Personal communication to FlyBase [FBrf0188570]).

<sup>i</sup> par-6 double RNAi transgenic line from Pinheiro and Montell, 2004.

<sup>j</sup> RNAi lines from NIG-Fly, Japan.

<sup>k</sup> RhoGAP19D RNAi transgenic lines (Luo insertions. Personal communication to FlyBase [FBrf0141849]).
