# Supplementary material for: On the Role of PDZ Domain-Encoding Genes in Drosophila Border Cell Migration
Source: PubMed Central journal article supplement (PMC3484668; doi:10.1534/g3.112.004093), 2012-11-01
Supplement: supp_2.11.1379_FigureS3.pdf [file supp_2.11.1379_FigureS3.pdf]

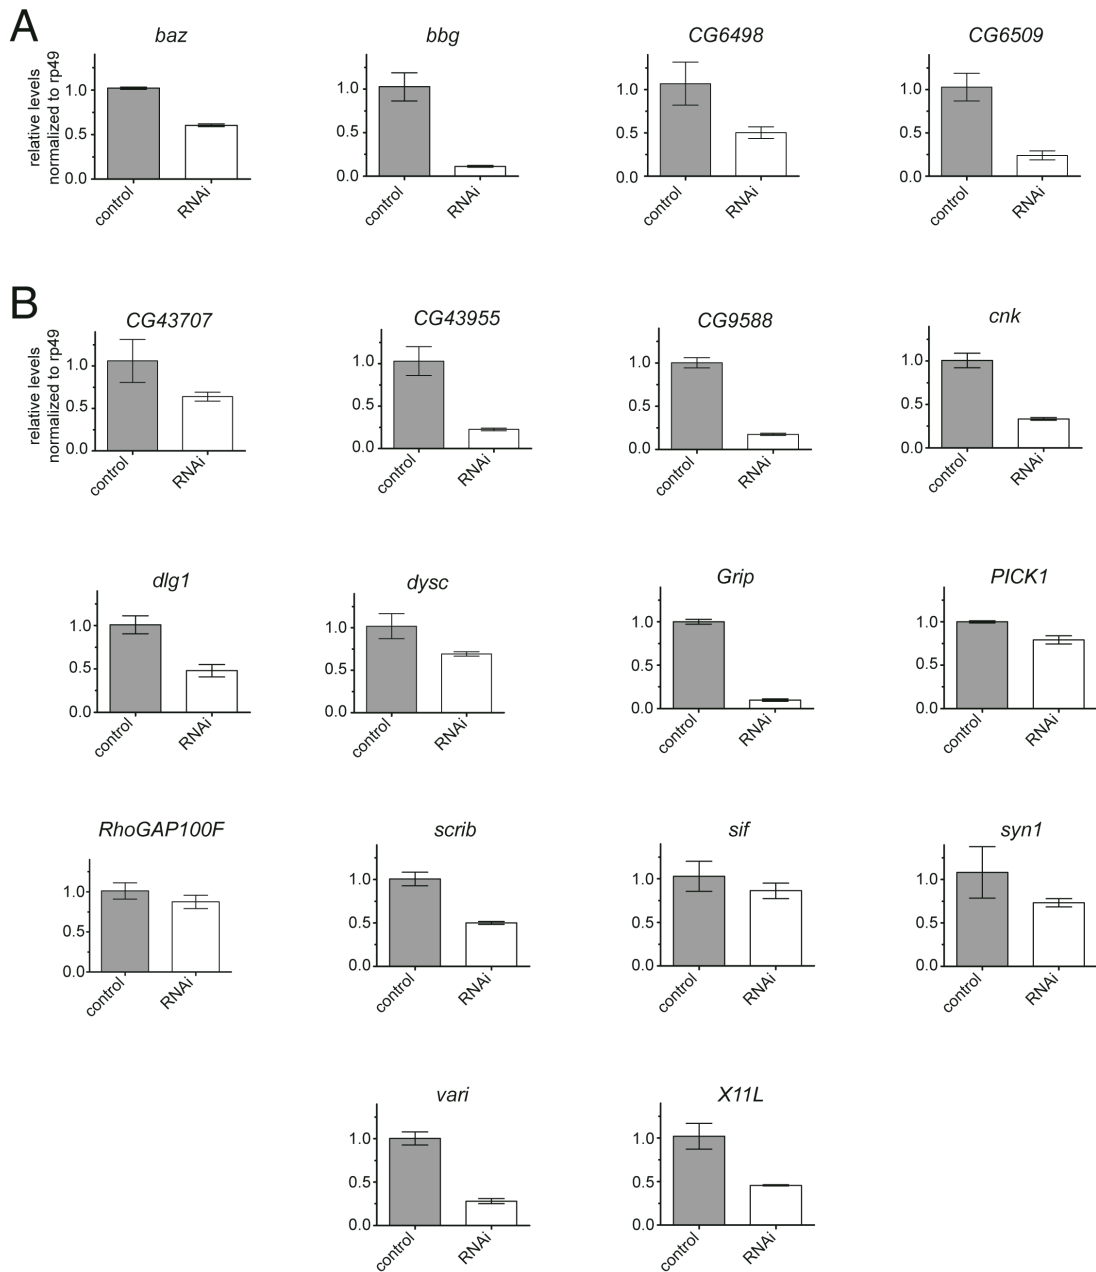

**Figure S3** Gene expression levels in control and RNAi knockdown measured by quantitative RT-PCR. Ubiquitous expression of RNAi against a subset of (A) positive candidates and (B) negative candidates result in varying degrees of knockdown. The mean transcript levels were calculated from three biological replicates using  $\Delta\Delta C_T$  method and normalized to *rp49* mRNA levels. Controls are RNAi to GFP. Error bars represent standard deviation.
