# Supplementary material for: On the Role of PDZ Domain-Encoding Genes in Drosophila Border Cell Migration
Source: PubMed Central journal article supplement (PMC3484668; doi:10.1534/g3.112.004093), 2012-11-01
Supplement: supp_2.11.1379_TableS1.pdf [file supp_2.11.1379_TableS1.pdf]

**Table S1 Complete results of the PDZ RNAi survey of border cell migration**

| Group <sup>a</sup> | Gene Name     | Gene Symbol | Annotation Symbol | RNAi line                 | trial 1               |                | trial 2  |     | trial 3  |     |
|--------------------|---------------|-------------|-------------------|---------------------------|-----------------------|----------------|----------|-----|----------|-----|
|                    |               |             |                   |                           | % defect <sup>b</sup> | n <sup>c</sup> | % defect | n   | % defect | n   |
| Pos. Mult.         | bazooka       | baz         | CG5055            | 2914 (M) <sup>d</sup>     | 43% <sup>e</sup>      | 116            |          |     |          |     |
|                    |               |             |                   | 2915 (M)                  | 23%                   | 137            |          |     |          |     |
| Pos. Mult.         | big bang      | bbg         | CG42230           | 15975                     | 19%                   | 58             | 15%      | 112 |          |     |
|                    |               |             |                   | 101691                    | 10%                   | 132            |          |     |          |     |
|                    |               |             |                   | 36111                     | 6%                    | 78             |          |     |          |     |
| Pos. Mult.         | CASK ortholog | CASK        | CG6703            | 34185 (S†,M) <sup>f</sup> | 23%                   | 79             | 15%      | 80  |          |     |
|                    |               |             |                   | 34184                     | 22%                   | 122            | 10%      | 251 |          |     |
|                    |               |             |                   | 104793                    | 2%                    | 139            |          |     |          |     |
| Pos. Mult.         | CG5921        | CG5921      | CG5921            | 37875                     | 33%                   | 94             | 23%      | 106 |          |     |
|                    |               |             |                   | 37874                     | 18%                   | 91             |          |     |          |     |
| Pos. Mult.         | CG6498        | CG6498      | CG6498            | 35101                     | 20%                   | 97             | 11%      | 125 |          |     |
|                    |               |             |                   | 35100                     | 17%                   | 116            | 12%      | 164 |          |     |
|                    |               |             |                   | 109282                    | 13%                   | 176            |          |     |          |     |
| Pos. Mult.         | CG6509        | CG6509      | CG6509            | 46234 (S†,M)              | 11%                   | 54             | 12%      | 139 |          |     |
|                    |               |             |                   | 101596                    | 11%                   | 74             |          |     |          |     |
|                    |               |             |                   | 22496 (S†,M)              | 9%                    | 87             |          |     |          |     |
| Pos. Mult.         | Gef26         | Gef26       | CG9491            | 27017 (M)                 | 19%                   | 86             | 28%      | 197 |          |     |
|                    |               |             |                   | 27015 (M)                 | 10%                   | 98             | 20%      | 98  |          |     |
|                    |               |             |                   | 105159                    | 15%                   | 59             |          |     |          |     |
| Pos. Mult.         | Lap1          | Lap1        | CG10255           | 18600 (M)                 | 15%                   | 112            | 13%      | 119 |          |     |
|                    |               |             |                   | JF02362 <sup>g</sup>      | 10%                   | 134            |          |     |          |     |
| Pos. Mult.         | LIM-kinase1   | LIMK1       | CG1848            | 25344                     | 10%                   | 125            | 8%       | 194 | 12%      | 220 |
|                    |               |             |                   | 25343                     | 6%                    | 128            |          |     |          |     |
|                    |               |             |                   | 2x RNAi <sup>h</sup>      | 18%                   | 50             |          |     |          |     |
| Pos. Mult.         | par-6         | par-6       | CG5884            | 19732 (M†)                | 38%                   | 58             | 26%      | 114 |          |     |
|                    |               |             |                   | 108560                    | 44%                   | 59             |          |     |          |     |
|                    |               |             |                   | 2x RNAi <sup>i</sup>      | 14%                   | 132            |          |     |          |     |
| Pos. Mult.         | PatJ          | Patj        | CG12021           | 31620                     | 13%                   | 168            | 20%      | 128 |          |     |
|                    |               |             |                   | 12021R-3 <sup>j</sup>     | 26%                   | 184            |          |     |          |     |
|                    |               |             |                   | 101877                    | 3%                    | 63             |          |     |          |     |
|                    |               |             |                   | 12021R-4 <sup>j</sup>     | lethal                |                | lethal   |     |          |     |
| Pos. Mult.         | Rim           | Rim         | CG33547           | 39384                     | 26%                   | 92             | 12%      | 50  |          |     |
|                    |               |             |                   | 39385                     | 24%                   | 94             | 1%       | 78  | 12%      | 113 |
|                    |               |             |                   | JF02610 <sup>g</sup>      | 7%                    | 254            |          |     |          |     |
| Pos. Mult.         | stardust      | sdt         | CG32717           | 100685                    | 39%                   | 62             | 11%      | 57  |          |     |
|                    |               |             |                   | 29844                     | 13%                   | 182            |          |     |          |     |
|                    |               |             |                   | 29843                     | 6%                    | 197            |          |     |          |     |
| Pos. Mult.         | veli          | veli        | CG7662            | 43094 (M†)                | 50%                   | 88             | 27%      | 101 |          |     |

|             |                     |           |         |                                         |        |     |     |     |     |
|-------------|---------------------|-----------|---------|-----------------------------------------|--------|-----|-----|-----|-----|
|             |                     |           |         | 46963 (M)                               | 31%    | 61  |     |     |     |
| Pos. Single | CG14168             | CG14168   | CG14168 | 17414                                   | 13%    | 55  | 21% | 226 |     |
|             |                     |           |         | 103225                                  | 2%     | 56  |     |     |     |
| Pos. Single | CG34375             | CG34375   | CG34375 | 23904                                   | 29%    | 63  | 5%  | 166 | 13% |
|             |                     |           |         | 102586                                  | 4%     | 56  |     |     |     |
| Pos. Single | CG42319             | CG42319   | CG42319 | 23928                                   | 41%    | 152 |     |     |     |
|             |                     |           |         | 32835 (M)                               | 8%     | 197 |     |     |     |
| Pos. Single | CG42788             | CG42788   | CG42788 | 22311                                   | 40%    | 72  | 5%  | 134 | 11% |
|             |                     |           |         | 108180                                  | 1%     | 123 |     |     |     |
|             |                     |           |         | 45034                                   | 4%     | 72  |     |     |     |
| Pos. Single | CG6688              | CG6688    | CG6688  | 48260                                   | 15%    | 86  | 19% | 214 |     |
|             |                     |           |         | 106732                                  | 1%     | 139 |     |     |     |
| Pos. Single | Dishevelled         | dsh       | CG18361 | 101525                                  | 12%    | 93  |     |     |     |
|             |                     |           |         | JF01254 <sup>B</sup>                    | 6%     | 188 |     |     |     |
|             |                     |           |         | 18361R-2 <sup>j</sup>                   | lethal |     |     |     |     |
|             |                     |           |         | 18361R-3 <sup>j</sup>                   | lethal |     |     |     |     |
|             |                     |           |         | JF01253 <sup>B</sup>                    | 8%     | 89  |     |     |     |
|             | Efa6 pleckstrin and |           |         |                                         |        |     |     |     |     |
| Pos. Single | Sec7 domain         | Efa6      | CG31158 | 42321                                   | 14%    | 128 | 12% | 109 |     |
|             | containing          |           |         |                                         |        |     |     |     |     |
| Pos. Single | HtrA2               | HtrA2     | CG8464  | 24104                                   | 16%    | 75  | 9%  | 153 | 19% |
|             |                     |           |         | 24106                                   | 9%     | 132 |     |     |     |
|             | Magi                | Magi      | CG30388 | 41735                                   | 13%    | 128 | 4%  | 167 |     |
|             |                     |           |         | 41736                                   | 10%    | 62  |     |     |     |
| Pos. Single | menage a trois      | metro     | CG30021 | 29967                                   | 10%    | 73  |     |     |     |
|             |                     |           |         | 29965                                   | 1%     | 128 |     |     |     |
|             |                     |           |         | 110814                                  | 1%     | 129 |     |     |     |
| Pos. Single | polychaetoid        | pyd       | CG43140 | 38863                                   | 15%    | 111 | 23% | 188 |     |
|             |                     |           |         | 104159                                  | 6%     | 142 |     |     |     |
| Pos. Single | Ptpmeg              | Ptpmeg    | CG1228  | 38651                                   | 12%    | 165 | 22% | 78  |     |
|             |                     |           |         | 103740                                  | 3%     | 130 |     |     |     |
| Pos. Single | RhoGAP19D           | RhoGAP19D | CG1412  | 43955 (M <sup>+</sup> )                 | 42%    | 57  | 59% | 165 |     |
|             |                     |           |         | HMS00352 <sup>B</sup>                   | 9%     | 161 |     |     |     |
|             |                     |           |         | dsRNA 2.1 <sup>k</sup>                  | 8%     | 217 |     |     |     |
|             |                     |           |         | dsRNA 3.1 <sup>k</sup>                  | 3%     | 62  |     |     |     |
| Pos. Single | Rhophilin           | Rhp       | CG8497  | 24111                                   | 13%    | 102 | 11% | 204 |     |
|             |                     |           |         | 110377                                  | 3%     | 152 |     |     |     |
| Pos. Single | Slip1               | Slip1     | CG1783  | 33006 (S)                               | 22%    | 124 | 10% | 168 |     |
|             |                     |           |         | 101106                                  | 6%     | 71  |     |     |     |
| Pos. Single | Syntrophin-like 2   | Syn2      | CG4905  | JF02999 <sup>B</sup>                    | 11%    | 157 | 6%  | 84  |     |
|             |                     |           |         | 110602                                  | 10%    | 67  |     |     |     |
| Pos. Single | Z band              | Zasp52    | CG30084 | 36563 (S <sup>+</sup> ,M <sup>+</sup> ) | 37%    | 97  | 19% | 124 |     |

|          |                                     |         |         | alternatively<br>spliced PDZ-motif<br>protein 52 |        |     |    |     |
|----------|-------------------------------------|---------|---------|--------------------------------------------------|--------|-----|----|-----|
|          |                                     |         |         | 106177                                           | 3%     | 65  |    |     |
|          |                                     |         |         | JF01133 <sup>B</sup>                             | 4%     | 227 |    |     |
| Negative | canoe                               | cno     | CG42312 | 102686                                           | 3%     | 92  |    |     |
| Negative | CG10362                             | CG10362 | CG10362 | 8317                                             | 4%     | 52  |    |     |
| Negative | CG15617                             | CG15617 | CG15617 | 19148                                            | 37%    | 65  | 7% | 162 |
|          |                                     |         |         | 19149                                            | 7%     | 94  | 6% | 167 |
|          |                                     |         |         | 103267                                           | 2%     | 50  |    |     |
| Negative | CG15803                             | CG15803 | CG15803 | 43635                                            | 3%     | 59  |    |     |
|          |                                     |         |         | 43636                                            | 1%     | 135 |    |     |
| Negative | CG32758                             | CG32758 | CG32758 | 28457                                            | 4%     | 99  |    |     |
|          |                                     |         |         | 108542                                           | 4%     | 130 |    |     |
| Negative | CG3402                              | CG3402  | CG3402  | 21485 (M <sup>+</sup> )                          | 7%     | 58  |    |     |
|          |                                     |         |         | 110191                                           | 6%     | 125 |    |     |
| Negative | CG43707                             | CG43707 | CG43707 | 25846S                                           | 8%     | 130 |    |     |
|          |                                     |         |         | 25847 (S <sup>+</sup> )                          | 6%     | 89  |    |     |
| Negative | CG43955                             | CG43955 | CG43955 | 103267                                           | 2%     | 50  |    |     |
| Negative | CG6619                              | CG6619  | CG6619  | 15622                                            | 4%     | 67  |    |     |
| Negative | CG9588                              | CG9588  | CG9588  | 47763                                            | 2%     | 95  |    |     |
|          |                                     |         |         | 100126                                           | 4%     | 167 |    |     |
|          |                                     |         |         | HM05013 <sup>B</sup>                             | 0%     | 93  |    |     |
| Negative | connector<br>enhancer of kar        | cnk     | CG6556  | 107746                                           | 3%     | 135 |    |     |
|          |                                     |         |         | HMS00238 <sup>B</sup>                            | 3%     | 152 |    |     |
| Negative | discs large 1                       | dlg1    | CG1725  | 41134 (S <sup>+</sup> ,M <sup>+</sup> )          | 4%     | 85  |    |     |
|          |                                     |         |         | 109274                                           | 2%     | 132 |    |     |
|          |                                     |         |         | 41136                                            | lethal |     |    |     |
|          |                                     |         |         | HMS01521 <sup>B</sup>                            | lethal |     |    |     |
| Negative | dyschronic                          | dysc    | CG43749 | 23278                                            | 9%     | 92  |    |     |
|          |                                     |         |         | 14082                                            | 5%     | 59  |    |     |
|          |                                     |         |         | 110019                                           | 3%     | 135 |    |     |
|          | Glutamate                           |         |         |                                                  |        |     |    |     |
| Negative | receptor binding<br>protein         | Grip    | CG14447 | 21003 (S <sup>+</sup> )                          | 5%     | 57  |    |     |
|          |                                     |         |         | 103551                                           | 6%     | 71  |    |     |
| Negative | Grasp65                             | Grasp65 | CG7809  | 22564                                            | 1%     | 125 |    |     |
| Negative | inactivation no<br>afterpotential D | inaD    | CG3504  | 26211                                            | 6%     | 64  |    |     |
| Negative | kermit                              | kermit  | CG11546 | 109297                                           | 2%     | 131 |    |     |
| Negative | locomotion defects                  | loco    | CG5248  | 9248 (M)                                         | 10%    | 67  | 6% | 237 |

|            |                                            |            |         |                          |        |     |    |     |
|------------|--------------------------------------------|------------|---------|--------------------------|--------|-----|----|-----|
|            |                                            |            |         | 110275                   | 7%     | 149 |    |     |
|            |                                            |            |         | HMS00455 <sup>B</sup>    | 3%     | 189 |    |     |
| Negative   | PICK1                                      | PICK1      | CG6167  | 22268                    | 4%     | 74  |    |     |
|            |                                            |            |         | 104486                   | 1%     | 163 |    |     |
|            |                                            |            |         | JF01199 <sup>B</sup>     | 3%     | 222 |    |     |
| Negative   | Prosap                                     | Prosap     | CG30483 | 21216 (M <sup>+</sup> )  | 5%     | 59  |    |     |
|            |                                            |            |         | 103592                   | 4%     | 98  |    |     |
| Negative   | Protostome-specific GEF                    | PsGEF      | CG43947 | 32088                    | 8%     | 122 |    |     |
|            |                                            |            |         | 109769                   | 1%     | 154 |    |     |
| Negative   | RhoGAP100F                                 | RhoGAP100F | CG1976  | 106241                   | 0%     | 62  |    |     |
|            |                                            |            |         | HMS00740 <sup>B</sup>    | 1%     | 161 |    |     |
| Negative   | RhoGEF2                                    | RhoGEF2    | CG9635  | JF01747 <sup>B</sup>     | 13%    | 145 | 6% | 135 |
|            |                                            |            |         | HMS01118 <sup>B</sup>    | 7%     | 180 |    |     |
|            |                                            |            |         | 110577                   | 3%     | 90  |    |     |
| Negative   | scribbled                                  | scrib      | CG43398 | 105412                   | 5%     | 172 |    |     |
|            |                                            |            |         | HMS01490 <sup>B</sup>    | lethal |     |    |     |
| Negative   | Spinophilin                                | Spn        | CG16757 | 19658 (S)                | 4%     | 56  |    |     |
|            |                                            |            |         | 105888                   | 1%     | 106 |    |     |
| Negative   | sprite                                     | sprt       | CG30023 | 107873                   | 2%     | 122 |    |     |
| Negative   | SRY interacting protein 1                  | Sip1       | CG10939 | 16958                    | 15%    | 65  | 9% | 170 |
| Negative   | still life                                 | sif        | CG34418 | 26132 (M)                | 7%     | 89  |    |     |
|            |                                            |            |         | 106832                   | 1%     | 106 |    |     |
| Negative   | Syntrophin-like 1                          | Syn1       | CG7152  | 27893                    | 4%     | 73  |    |     |
|            |                                            |            |         | 104992                   | 3%     | 111 |    |     |
|            |                                            |            |         | JF02654 <sup>B</sup>     | 3%     | 138 |    |     |
| Negative   | varicose                                   | vari       | CG9326  | 24156 (M <sup>+</sup> )  | 4%     | 70  |    |     |
|            |                                            |            |         | 104548                   | 6%     | 87  |    |     |
|            |                                            |            |         | HM05087 <sup>B</sup>     | 2%     | 124 |    |     |
| Negative   | X11L                                       | X11L       | CG5675  | 28652                    | 9%     | 110 |    |     |
|            |                                            |            |         | 27479                    | 9%     | 114 |    |     |
| Negative   | X11Lbeta                                   | X11Lbeta   | CG32677 | 8309 (S,M <sup>+</sup> ) | 2%     | 51  |    |     |
|            | Z band                                     |            |         |                          |        |     |    |     |
| Negative   | alternatively spliced PDZ-motif protein 66 | Zasp66     | CG6416  | 102980                   | 5%     | 131 |    |     |
| Not tested | arc                                        | a          | CG6741  |                          |        |     |    |     |
| Not tested | Myosin heavy chain-like                    | Mhcl       | CG31045 |                          |        |     |    |     |

<sup>a</sup> Group designation are as follows: Pos. Mult. = Positive, Multiple Hits; Pos. Single = Positive, Single Hit; Negative = No Hit.

<sup>b</sup> Percentage of stage 10 egg chambers in which border cell migration defects were observed upon RNAi expression.

<sup>c</sup> Number of stage 10 egg chambers scored per trial. N ≥ 50 in every trial.

<sup>d</sup> Lines that produced a phenotype (M) or were lethal (M<sup>†</sup>) in a genome-wide RNAi screen to study Notch signaling in *Drosophila* (Mummary-Widmer et al., 2009).

<sup>e</sup> Values highlighted in orange represent a migration defect ( $\geq 10\%$ ).

<sup>f</sup> Lines that produced a phenotype (S) or were lethal (S<sup>†</sup>) in a genome-wide RNAi screen to study *Drosophila* muscle morphogenesis and function (Schnorrer et al., 2010).

<sup>g</sup> RNAi lines from the Transgenic RNAi Project (TRiP), Harvard Medical School.

<sup>h</sup> LIMK1 double RNAi transgenic line (Ng insertions. Personal communication to FlyBase [FBrf0188570]).

<sup>i</sup> par-6 double RNAi transgenic line from Pinheiro and Montell, 2004.

<sup>j</sup> RNAi lines from NIG-Fly, Japan.

<sup>k</sup> RhoGAP19D RNAi transgenic lines (Luo insertions. Personal communication to FlyBase [FBrf0141849]).
